# Supplementary material
Source: ML conference proceedings conference paper supplement (https://openreview.net/forum?id=cQLG7HQ5hH)
Supplement: supplementary_material [file attachment]

# Supplementary Materials: DQG: Database Question Generation for Exact Text-based Image Retrieval

Anonymous Authors

## 1 COMPUTATIONAL COMPLEXITY

In the training phase, using two NVIDIA GeForce RTX 2080 Ti GPUs and an Intel Core i9-10980XE CPU, one hour and six hours were required for loss convergence in MSCOCO and Visual Genome datasets, respectively. Also, in the test phase, 19.7 and 37.1 seconds were required for conducting the re-ranking in MSCOCO and Visual Genome datasets, respectively.

## 2 CODE OF OUR METHOD

In this supplemental material, we provide the code of our paper. The detail instruction of our code is described in “ReadMe.md” of “CodeForReview” folder.

## 3 COMPARISON WITH THE OTHER METHODS

With the limitation of the page lengths, we only provide the comparison with the representative state-of-the-art methods in the main paper. Therefore, in this supplementary material, we provide comparisons with the other state-of-the-art methods. Specifically, UVS [5], OE [9], DPC [11], VSEPP [1], RRF-Net [7], CMPM [10], SISM [3], GXN [2], PVSE [8], SAN [4], and VSRN [6] are used as the comparative methods.

Experimental results are shown in Tables 1, 2, 3, 4, respectively. In each experiment, we also reach the same conclusions in the main paper.

Table 1: Experimental results for R@k, mean rank, and median rank using MSCOCO dataset.

|                                    | R@1          | R@10         | Mean          | Med      |
|------------------------------------|--------------|--------------|---------------|----------|
| UVS                                | 0.154        | 0.504        | 70.464        | 10       |
| UVS+Ours w/o opt                   | 0.278        | 0.651        | 51.114        | 7        |
| UVS+Ours w/o $L^{\mathcal{D}}$     | 0.310        | 0.722        | 43.063        | 6        |
| <b>UVS+Ours</b>                    | <b>0.329</b> | <b>0.734</b> | <b>40.596</b> | <b>5</b> |
| OE                                 | 0.187        | 0.576        | 64.592        | 9        |
| OE+Ours w/o opt                    | 0.298        | 0.684        | 56.661        | 7        |
| OE+Ours w/o $L^{\mathcal{D}}$      | 0.321        | 0.734        | 50.660        | 7        |
| <b>OE+Ours</b>                     | <b>0.341</b> | <b>0.755</b> | <b>48.059</b> | <b>5</b> |
| DPC                                | 0.288        | 0.703        | 53.540        | 9        |
| DPC+Ours w/o opt                   | 0.338        | 0.781        | 40.006        | 6        |
| DPC+Ours w/o $L^{\mathcal{D}}$     | 0.355        | 0.832        | 23.102        | 5        |
| <b>DPC+Ours</b>                    | <b>0.398</b> | <b>0.838</b> | <b>18.592</b> | <b>4</b> |
| VSEPP                              | 0.297        | 0.724        | 52.440        | 9        |
| VSEPP+Ours w/o opt                 | 0.354        | 0.791        | 38.994        | 7        |
| VSEPP+Ours w/o $L^{\mathcal{D}}$   | 0.374        | 0.822        | 24.510        | 6        |
| <b>VSEPP+Ours</b>                  | <b>0.401</b> | <b>0.822</b> | <b>17.662</b> | <b>5</b> |
| RRF-Net                            | 0.294        | 0.709        | 47.300        | 9        |
| RRF-Net+Ours w/o opt               | 0.340        | 0.773        | 34.555        | 6        |
| RRF-Net+Ours w/o $L^{\mathcal{D}}$ | 0.403        | 0.823        | 17.663        | 4        |
| <b>RRF-Net+Ours</b>                | <b>0.417</b> | <b>0.840</b> | <b>15.511</b> | <b>4</b> |
| CMPM                               | 0.303        | 0.752        | 30.223        | 7        |
| CMPM+Ours w/o opt                  | 0.349        | 0.804        | 22.533        | 5        |
| CMPM+Ours w/o $L^{\mathcal{D}}$    | 0.426        | 0.844        | 17.544        | 4        |
| <b>CMPM+Ours</b>                   | <b>0.431</b> | <b>0.864</b> | <b>12.441</b> | <b>2</b> |
| SISM                               | 0.301        | 0.755        | 28.480        | 5        |
| SISM+Ours w/o opt                  | 0.354        | 0.819        | 20.115        | 3        |
| SISM+Ours w/o $L^{\mathcal{D}}$    | 0.420        | 0.833        | 14.682        | 2        |
| <b>SISM+Ours</b>                   | <b>0.433</b> | <b>0.849</b> | <b>12.011</b> | <b>2</b> |
| GXN                                | 0.307        | 0.746        | 26.731        | 3        |
| GXN+Ours w/o opt                   | 0.374        | 0.792        | 19.931        | 3        |
| GXN+Ours w/o $L^{\mathcal{D}}$     | 0.432        | 0.827        | 11.042        | 2        |
| <b>GXN+Ours</b>                    | <b>0.455</b> | <b>0.830</b> | <b>10.615</b> | <b>2</b> |
| PVSE                               | 0.324        | 0.759        | 20.463        | 3        |
| PVSE+Ours w/o opt                  | 0.393        | 0.809        | 15.195        | 2        |
| PVSE+Ours w/o $L^{\mathcal{D}}$    | 0.479        | 0.860        | 9.771         | 1        |
| <b>PVSE+Ours</b>                   | <b>0.481</b> | <b>0.864</b> | <b>9.515</b>  | <b>1</b> |
| SAN                                | 0.337        | 0.777        | 23.143        | 2        |
| SAN+Ours w/o opt                   | 0.397        | 0.814        | 14.293        | 2        |
| SAN+Ours w/o $L^{\mathcal{D}}$     | 0.452        | 0.836        | 12.663        | 2        |
| <b>SAN+Ours</b>                    | <b>0.499</b> | <b>0.865</b> | <b>9.193</b>  | <b>1</b> |
| VSRN                               | 0.403        | 0.701        | 15.323        | 1        |
| VSRN+Ours w/o opt                  | 0.455        | 0.825        | 9.995         | 1        |
| VSRN+Ours w/o $L^{\mathcal{D}}$    | 0.503        | 0.854        | 7.524         | 1        |
| <b>VSRN+Ours</b>                   | <b>0.521</b> | <b>0.868</b> | <b>6.777</b>  | <b>1</b> |

**Table 2: Experimental results for R@k, mean rank, and median rank using the VG dataset.**

|                                    | R@1           | R@10         | Mean            | Med        |
|------------------------------------|---------------|--------------|-----------------|------------|
| UVS                                | 0.0218        | 0.107        | 5842.051        | 588.5      |
| UVS+Ours w/o opt                   | 0.0331        | 0.156        | 3542.519        | 421        |
| UVS+Ours w/o $L^{\mathcal{D}}$     | 0.0931        | 0.187        | 2699.894        | 183        |
| <b>UVS+Ours</b>                    | <b>0.0944</b> | <b>0.191</b> | <b>2659.331</b> | <b>180</b> |
| OE                                 | 0.0248        | 0.110        | 4324.212        | 531.5      |
| OE+Ours w/o opt                    | 0.0348        | 0.162        | 2950.444        | 306        |
| OE+Ours w/o $L^{\mathcal{D}}$      | 0.0998        | 0.210        | 2511.422        | 181        |
| <b>OE+Ours</b>                     | <b>0.102</b>  | <b>0.211</b> | <b>2499.590</b> | <b>175</b> |
| DPC                                | 0.0263        | 0.118        | 3659.612        | 475        |
| DPC+Ours w/o opt                   | 0.0368        | 0.158        | 2958.345        | 275        |
| DPC+Ours w/o $L^{\mathcal{D}}$     | 0.0911        | 0.197        | 2603.443        | 201        |
| <b>DPC+Ours</b>                    | <b>0.0939</b> | <b>0.201</b> | <b>2542.332</b> | <b>179</b> |
| VSEPP                              | 0.0266        | 0.118        | 3646.613        | 365        |
| VSEPP+Ours w/o opt                 | 0.0374        | 0.166        | 3002.231        | 246        |
| VSEPP+Ours w/o $L^{\mathcal{D}}$   | 0.0992        | 0.206        | 2511.114        | 174        |
| <b>VSEPP+Ours</b>                  | <b>0.107</b>  | <b>0.217</b> | <b>2485.237</b> | <b>168</b> |
| RRF-Net                            | 0.0268        | 0.119        | 3588.127        | 318        |
| RRF-Net+Ours w/o opt               | 0.0392        | 0.168        | 2974.329        | 225        |
| RRF-Net+Ours w/o $L^{\mathcal{D}}$ | 0.102         | 0.209        | 2605.666        | 201        |
| <b>RRF-Net+Ours</b>                | <b>0.112</b>  | <b>0.212</b> | <b>2500.776</b> | <b>177</b> |
| CMPM                               | 0.0270        | 0.122        | 3530.614        | 274        |
| CMPM+Ours w/o opt                  | 0.0387        | 0.172        | 2922.571        | 219        |
| CMPM+Ours w/o $L^{\mathcal{D}}$    | 0.0943        | 0.199        | 2456.092        | 172        |
| <b>CMPM+Ours</b>                   | <b>0.105</b>  | <b>0.229</b> | <b>2401.220</b> | <b>165</b> |
| SISM                               | 0.0275        | 0.121        | 3266.327        | 266        |
| SISM+Ours w/o opt                  | 0.0398        | 0.170        | 2901.392        | 212        |
| SISM+Ours w/o $L^{\mathcal{D}}$    | 0.0951        | 0.201        | 2503.441        | 201        |
| <b>SISM+Ours</b>                   | <b>0.110</b>  | <b>0.218</b> | <b>2478.531</b> | <b>171</b> |
| GXN                                | 0.0278        | 0.125        | 3185.392        | 271        |
| GXN+Ours w/o opt                   | 0.0409        | 0.174        | 2885.332        | 201        |
| GXN+Ours w/o $L^{\mathcal{D}}$     | 0.110         | 0.219        | 2603.225        | 183        |
| <b>GXN+Ours</b>                    | <b>0.118</b>  | <b>0.225</b> | <b>2500.032</b> | <b>165</b> |
| PVSE                               | 0.0280        | 0.129        | 2943.513        | 258        |
| PVSE+Ours w/o opt                  | 0.0431        | 0.179        | 2742.562        | 190        |
| PVSE+Ours w/o $L^{\mathcal{D}}$    | 0.0985        | 0.221        | 2504.593        | 176        |
| <b>PVSE+Ours</b>                   | <b>0.104</b>  | <b>0.234</b> | <b>2485.331</b> | <b>163</b> |
| SAN                                | 0.0286        | 0.130        | 2861.242        | 248        |
| SAN+Ours w/o opt                   | 0.0442        | 0.180        | 27694.322       | 185        |
| SAN+Ours w/o $L^{\mathcal{D}}$     | 0.114         | 0.225        | 2634.507        | 164        |
| <b>SAN+Ours</b>                    | <b>0.122</b>  | <b>0.242</b> | <b>2433.492</b> | <b>153</b> |
| VSRN                               | 0.0390        | 0.130        | 2861.242        | 248        |
| VSRN+Ours w/o opt                  | 0.0472        | 0.185        | 2800.293        | 176        |
| VSRN+Ours w/o $L^{\mathcal{D}}$    | 0.120         | 0.233        | 2421.063        | 152        |
| <b>VSRN+Ours</b>                   | <b>0.124</b>  | <b>0.248</b> | <b>2394.391</b> | <b>147</b> |

**Table 3: Experimental results for DScore in MSCOCO and Visual Genome dataset. Since “Ours w/o opt” can be considered as upper limits of the other methods, we also show the margin between “Ours w/o opt” and the other methods.**

|                                    | DScore<br>in MSCOCO   | DScore<br>in VG       |
|------------------------------------|-----------------------|-----------------------|
| UVS+Ours w/o opt                   | 0.978                 | 0.949                 |
| UVS+Ours w/o $L^{\mathcal{D}}$     | 0.324 (-0.654)        | 0.239 (-0.710)        |
| <b>UVS+Ours</b>                    | <b>0.948 (-0.030)</b> | <b>0.917 (-0.032)</b> |
| OE+Ours w/o opt                    | 0.947                 | 0.946                 |
| OE+Ours w/o $L^{\mathcal{D}}$      | 0.419 (-0.528)        | 0.429 (-0.517)        |
| <b>OE+Ours</b>                     | <b>0.900 (-0.047)</b> | <b>0.919 (-0.027)</b> |
| DPC+Ours w/o opt                   | 0.957                 | 0.997                 |
| DPC+Ours w/o $L^{\mathcal{D}}$     | 0.461 (-0.496)        | 0.401 (-0.596)        |
| <b>DPC+Ours</b>                    | <b>0.955 (-0.002)</b> | <b>0.989 (-0.008)</b> |
| VSEPP+Ours w/o opt                 | 0.983                 | 0.971                 |
| VSEPP+Ours w/o $L^{\mathcal{D}}$   | 0.319 (-0.664)        | 0.330 (-0.641)        |
| <b>VSEPP+Ours</b>                  | <b>0.979 (-0.004)</b> | <b>0.958 (-0.013)</b> |
| RRF-Net+Ours w/o opt               | 0.990                 | 0.985                 |
| RRF-Net+Ours w/o $L^{\mathcal{D}}$ | 0.310 (-0.680)        | 0.299 (-0.686)        |
| <b>RRF-Net+Ours</b>                | <b>0.982 (-0.008)</b> | <b>0.970 (-0.015)</b> |
| CMPM+Ours w/o opt                  | 0.956                 | 0.969                 |
| CMPM+Ours w/o $L^{\mathcal{D}}$    | 0.138 (-0.818)        | 0.172 (-0.797)        |
| <b>CMPM+Ours</b>                   | <b>0.954 (-0.002)</b> | <b>0.957 (-0.012)</b> |
| SISM+Ours w/o opt                  | 0.989                 | 0.990                 |
| SISM+Ours w/o $L^{\mathcal{D}}$    | 0.429 (-0.560)        | 0.391 (-0.599)        |
| <b>SISM+Ours</b>                   | <b>0.979 (-0.010)</b> | <b>0.983 (-0.007)</b> |
| GXN+Ours w/o opt                   | 0.991                 | 0.942                 |
| GXN+Ours w/o $L^{\mathcal{D}}$     | 0.310 (-0.681)        | 0.444 (-0.498)        |
| <b>GXN+Ours</b>                    | <b>0.988 (-0.003)</b> | <b>0.932 (-0.010)</b> |
| PVSE+Ours w/o opt                  | 0.901                 | 0.948                 |
| PVSE+Ours w/o $L^{\mathcal{D}}$    | 0.293 (-0.708)        | 0.228 (-0.720)        |
| <b>PVSE+Ours</b>                   | <b>0.899 (-0.002)</b> | <b>0.930 (-0.018)</b> |
| SAN+Ours w/o opt                   | 0.999                 | 0.985                 |
| SAN+Ours w/o $L^{\mathcal{D}}$     | 0.492 (-0.507)        | 0.300 (-0.685)        |
| <b>SAN+Ours</b>                    | <b>0.993 (-0.006)</b> | <b>0.984 (-0.001)</b> |
| VSRN+Ours w/o opt                  | 0.979                 | 0.969                 |
| VSRN+Ours w/o $L^{\mathcal{D}}$    | 0.429 (-0.550)        | 0.325 (-0.644)        |
| <b>VSRN+Ours</b>                   | <b>0.968 (-0.011)</b> | <b>0.960 (-0.009)</b> |

**Table 4: Experimental results for R@k, mean rank and median rank using the biased-MSOCO DB.**

|                                    | R@1          | R@10         | Mean          | Med      |
|------------------------------------|--------------|--------------|---------------|----------|
| UVS                                | 0.161        | 0.471        | 57.684        | 12       |
| UVS+Ours w/o opt                   | 0.185        | 0.492        | 50.338        | 10       |
| UVS+Ours w/o $L^{\mathcal{D}}$     | 0.304        | 0.688        | 29.509        | 8        |
| <b>UVS+Ours</b>                    | <b>0.321</b> | <b>0.705</b> | <b>22.441</b> | <b>7</b> |
| OE                                 | 0.194        | 0.532        | 39.144        | 10       |
| OE+Ours w/o opt                    | 0.205        | 0.588        | 31.115        | 8        |
| OE+Ours w/o $L^{\mathcal{D}}$      | 0.303        | 0.719        | 21.442        | 7        |
| <b>OE+Ours</b>                     | <b>0.339</b> | <b>0.739</b> | <b>19.422</b> | <b>5</b> |
| DPC                                | 0.295        | 0.665        | 25.142        | 9        |
| DPC+Ours w/o opt                   | 0.310        | 0.698        | 23.684        | 8        |
| DPC+Ours w/o $L^{\mathcal{D}}$     | 0.346        | 0.731        | 19.402        | 6        |
| <b>DPC+Ours</b>                    | <b>0.359</b> | <b>0.752</b> | <b>17.702</b> | <b>4</b> |
| VSEPP                              | 0.305        | 0.650        | 24.771        | 8        |
| VSEPP+Ours w/o opt                 | 0.343        | 0.697        | 20.190        | 6        |
| VSEPP+Ours w/o $L^{\mathcal{D}}$   | 0.406        | 0.733        | 18.802        | 5        |
| <b>VSEPP+Ours</b>                  | <b>0.426</b> | <b>0.784</b> | <b>16.666</b> | <b>4</b> |
| RRF-Net                            | 0.314        | 0.635        | 19.324        | 8        |
| RRF-Net+Ours w/o opt               | 0.329        | 0.652        | 18.492        | 7        |
| RRF-Net+Ours w/o $L^{\mathcal{D}}$ | 0.384        | 0.693        | 17.994        | 7        |
| <b>RRF-Net+Ours</b>                | <b>0.429</b> | <b>0.744</b> | <b>15.638</b> | <b>4</b> |
| CMPM                               | 0.326        | 0.687        | 18.567        | 6        |
| CMPM+Ours w/o opt                  | 0.342        | 0.702        | 16.441        | 5        |
| CMPM+Ours w/o $L^{\mathcal{D}}$    | 0.450        | 0.780        | 12.885        | 3        |
| <b>CMPM+Ours</b>                   | <b>0.476</b> | <b>0.784</b> | <b>12.485</b> | <b>3</b> |
| SISM                               | 0.335        | 0.716        | 15.126        | 4        |
| SISM+Ours w/o opt                  | 0.349        | 0.752        | 13.092        | 4        |
| SISM+Ours w/o $L^{\mathcal{D}}$    | 0.403        | 0.801        | 12.031        | 2        |
| <b>SISM+Ours</b>                   | <b>0.448</b> | <b>0.814</b> | <b>11.329</b> | <b>2</b> |
| GXN                                | 0.332        | 0.741        | 15.441        | 4        |
| GXN+Ours w/o opt                   | 0.354        | 0.746        | 14.441        | 4        |
| GXN+Ours w/o $L^{\mathcal{D}}$     | 0.425        | 0.761        | 10.394        | 3        |
| <b>GXN+Ours</b>                    | <b>0.449</b> | <b>0.799</b> | <b>9.592</b>  | <b>2</b> |
| PVSE                               | 0.343        | 0.761        | 15.810        | 2        |
| PVSE+Ours w/o opt                  | 0.359        | 0.779        | 14.104        | 2        |
| PVSE+Ours w/o $L^{\mathcal{D}}$    | 0.438        | 0.844        | 12.204        | 1        |
| <b>PVSE+Ours</b>                   | <b>0.462</b> | <b>0.864</b> | <b>9.320</b>  | <b>1</b> |
| SAN                                | 0.347        | 0.768        | 15.110        | 2        |
| SAN+Ours w/o opt                   | 0.352        | 0.793        | 14.392        | 2        |
| SAN+Ours w/o $L^{\mathcal{D}}$     | 0.455        | 0.831        | 9.994         | 1        |
| <b>SAN+Ours</b>                    | <b>0.471</b> | <b>0.842</b> | <b>9.603</b>  | <b>1</b> |
| VSRN                               | 0.379        | 0.793        | 14.332        | 2        |
| VSRN+Ours w/o opt                  | 0.381        | 0.803        | 12.331        | 2        |
| VSRN+Ours w/o $L^{\mathcal{D}}$    | 0.499        | 0.877        | 7.506         | 1        |
| <b>VSRN+Ours</b>                   | <b>0.504</b> | <b>0.885</b> | <b>7.417</b>  | <b>1</b> |

## 4 EVALUATING THE EFFECTS OF THE NUMBER OF QUESTIONS

In the main paper, we only provide the experimental results of the single round re-ranking. On the other hand, our method can be used for multiple round re-ranking, and the retrieval performance can be further enhanced by repeatedly conducting QA-based re-ranking. In this section, we provide additional experiments for confirming the effects of the multiple-round re-ranking (i.e., the effects of the number of questions).

Experimental results are shown in Tables 5, 6, 7, respectively. In each table, “UVS + Ours (1)” reveals 1st round re-ranking results using the method by UVS and our approach. Experimental results show that the retrieval performance gradually improves with the round increasing. From these results, the effectiveness of the multiple-round re-ranking is confirmed. However, compared with the performance improvement of the 1st round re-ranking, those of the 2nd and 3rd re-ranking are moderate. We consider that these results come from the proposed architecture that does not especially focus on multiple-round re-ranking. In our future work, we will consider its architecture for further enhancing retrieval performance.

**Table 5: Experimental results for evaluating the effects of multiple-round re-ranking using MSCOCO dataset.**

|                  | R@1          | R@10         | Mean          | Med      |
|------------------|--------------|--------------|---------------|----------|
| UVS              | 0.154        | 0.504        | 70.464        | 10       |
| UVS+Ours (1)     | 0.329        | 0.734        | 40.596        | 5        |
| UVS+Ours (2)     | 0.345        | 0.765        | 37.553        | <b>4</b> |
| UVS+Ours (3)     | <b>0.364</b> | <b>0.787</b> | <b>33.183</b> | <b>4</b> |
| OE               | 0.187        | 0.576        | 64.592        | 9        |
| OE+Ours (1)      | 0.341        | 0.755        | 48.059        | 5        |
| OE+Ours (2)      | 0.356        | 0.776        | 43.059        | <b>4</b> |
| OE+Ours (3)      | <b>0.377</b> | <b>0.783</b> | <b>38.059</b> | <b>4</b> |
| DPC              | 0.288        | 0.703        | 53.540        | 9        |
| DPC+Ours (1)     | 0.398        | 0.838        | 18.592        | 4        |
| DPC+Ours (2)     | 0.412        | 0.843        | 15.223        | <b>3</b> |
| DPC+Ours (3)     | <b>0.422</b> | <b>0.847</b> | <b>14.332</b> | <b>3</b> |
| VSEPP            | 0.297        | 0.724        | 52.440        | 9        |
| VSEPP+Ours (1)   | 0.401        | 0.822        | 17.662        | 5        |
| VSEPP+Ours (2)   | 0.421        | 0.833        | 16.542        | <b>4</b> |
| VSEPP+Ours (3)   | <b>0.437</b> | <b>0.840</b> | <b>15.943</b> | <b>4</b> |
| RRF-Net          | 0.294        | 0.709        | 47.300        | 9        |
| RRF-Net+Ours (1) | 0.417        | 0.840        | 15.511        | <b>4</b> |
| RRF-Net+Ours (2) | 0.423        | 0.843        | 14.594        | <b>4</b> |
| RRF-Net+Ours (3) | <b>0.430</b> | <b>0.845</b> | <b>14.031</b> | <b>4</b> |
| CMPM             | 0.303        | 0.752        | 30.223        | 7        |
| CMPM+Ours (1)    | 0.431        | 0.864        | 12.441        | <b>2</b> |
| CMPM+Ours (2)    | 0.443        | 0.869        | 11.884        | <b>2</b> |
| CMPM+Ours (3)    | <b>0.450</b> | <b>0.873</b> | <b>10.294</b> | <b>2</b> |
| SISM             | 0.301        | 0.755        | 28.480        | 5        |
| SISM+Ours (1)    | 0.433        | 0.849        | 12.011        | <b>2</b> |
| SISM+Ours (2)    | 0.425        | 0.852        | 11.943        | <b>2</b> |
| SISM+Ours (3)    | <b>0.419</b> | <b>0.853</b> | <b>11.543</b> | <b>2</b> |
| GXN              | 0.307        | 0.746        | 26.731        | 3        |
| GXN+Ours (1)     | 0.455        | 0.830        | 10.615        | 2        |
| GXN+Ours (2)     | 0.463        | 0.834        | 9.925         | <b>1</b> |
| GXN+Ours (3)     | <b>0.478</b> | <b>0.840</b> | <b>8.961</b>  | <b>1</b> |
| PVSE             | 0.324        | 0.759        | 20.463        | 3        |
| PVSE+Ours (1)    | 0.481        | 0.864        | 9.515         | <b>1</b> |
| PVSE+Ours (2)    | 0.490        | 0.869        | 9.090         | <b>1</b> |
| PVSE+Ours (3)    | <b>0.499</b> | <b>0.873</b> | <b>8.760</b>  | <b>1</b> |
| SAN              | 0.337        | 0.777        | 23.143        | 2        |
| SAN+Ours (1)     | 0.499        | 0.865        | 9.193         | <b>1</b> |
| SAN+Ours (2)     | 0.499        | 0.865        | 9.193         | <b>1</b> |
| SAN+Ours (3)     | <b>0.499</b> | <b>0.865</b> | <b>9.193</b>  | <b>1</b> |
| VSRN             | 0.403        | 0.701        | 15.323        | <b>1</b> |
| VSRN+Ours (1)    | 0.521        | 0.868        | 6.777         | <b>1</b> |
| VSRN+Ours (2)    | 0.530        | 0.875        | 6.057         | <b>1</b> |
| VSRN+Ours (3)    | <b>0.539</b> | <b>0.879</b> | <b>5.872</b>  | <b>1</b> |
| PCME             | 0.352        | 0.765        | 25.322        | 3        |
| PCME+Ours (1)    | 0.441        | 0.851        | 9.551         | <b>1</b> |
| PCME+Ours (2)    | 0.464        | 0.860        | 9.403         | <b>1</b> |
| PCME+Ours (3)    | <b>0.477</b> | <b>0.864</b> | <b>9.001</b>  | <b>1</b> |
| SDE              | 0.379        | 0.735        | 20.632        | 3        |
| SDE+Ours (1)     | 0.475        | 0.858        | 8.339         | <b>1</b> |
| SDE+Ours (2)     | 0.489        | 0.860        | 8.011         | <b>1</b> |
| SDE+Ours (3)     | <b>0.490</b> | <b>0.864</b> | <b>7.694</b>  | <b>1</b> |
| CLIP             | 0.378        | 0.722        | 26.421        | 3        |
| CLIP+Ours (1)    | 0.436        | 0.846        | 9.744         | <b>1</b> |
| CLIP+Ours (2)    | 0.454        | 0.865        | 9.504         | <b>1</b> |
| CLIP+Ours (3)    | <b>0.476</b> | <b>0.870</b> | <b>9.041</b>  | <b>1</b> |
| BLIP             | 0.402        | 0.753        | 18.773        | 2        |
| BLIP+Ours (1)    | 0.531        | 0.867        | 8.631         | <b>1</b> |
| BLIP+Ours (2)    | 0.544        | 0.870        | 8.302         | <b>1</b> |
| BLIP+Ours (3)    | <b>0.554</b> | <b>0.873</b> | <b>8.001</b>  | <b>1</b> |

**Table 6: Experimental results for evaluating the effects of multiple-round re-ranking using the VG dataset.**

|                  | R@1          | R@10         | Mean            | Med        |
|------------------|--------------|--------------|-----------------|------------|
| UVS              | 0.0218       | 0.107        | 5842.051        | 588.5      |
| UVS+Ours (1)     | 0.0944       | 0.191        | 2659.331        | 180        |
| UVS+Ours (2)     | 0.102        | 0.199        | 2607.550        | 175        |
| UVS+Ours (3)     | <b>0.105</b> | <b>0.210</b> | <b>2579.660</b> | <b>169</b> |
| OE               | 0.0248       | 0.110        | 4324.212        | 531.5      |
| OE+Ours (1)      | 0.102        | 0.211        | 2499.590        | 175        |
| OE+Ours (2)      | 0.109        | 0.219        | 2403.430        | 170        |
| OE+Ours (3)      | <b>0.113</b> | <b>0.224</b> | <b>2367.706</b> | <b>167</b> |
| DPC              | 0.0263       | 0.118        | 3659.612        | 475        |
| DPC+Ours (1)     | 0.0939       | 0.201        | 2542.332        | 179        |
| DPC+Ours (2)     | 0.101        | 0.232        | 2340.450        | 170        |
| DPC+Ours (3)     | <b>0.114</b> | <b>0.234</b> | <b>2304.533</b> | <b>165</b> |
| VSEPP            | 0.0266       | 0.118        | 3646.613        | 365        |
| VSEPP+Ours (1)   | 0.107        | 0.217        | 2485.237        | 168        |
| VSEPP+Ours (2)   | 0.113        | 0.223        | 2405.432        | 163        |
| VSEPP+Ours (3)   | <b>0.119</b> | <b>0.226</b> | <b>2349.409</b> | <b>156</b> |
| RRF-Net          | 0.0268       | 0.119        | 3588.127        | 318        |
| RRF-Net+Ours (1) | 0.112        | 0.212        | 2500.776        | 177        |
| RRF-Net+Ours (2) | 0.118        | 0.219        | 2495.439        | 170        |
| RRF-Net+Ours (3) | <b>0.122</b> | <b>0.223</b> | <b>2465.053</b> | <b>164</b> |
| CMPM             | 0.0270       | 0.122        | 3530.614        | 274        |
| CMPM+Ours (1)    | 0.105        | 0.229        | 2401.220        | 165        |
| CMPM+Ours (2)    | 0.119        | 0.235        | 2349.090        | 162        |
| CMPM+Ours (3)    | <b>0.125</b> | <b>0.242</b> | <b>2300.001</b> | <b>154</b> |
| SISM             | 0.0275       | 0.121        | 3266.327        | 266        |
| SISM+Ours (1)    | 0.110        | 0.218        | 2478.531        | 171        |
| SISM+Ours (2)    | 0.114        | 0.229        | 2403.293        | 165        |
| SISM+Ours (3)    | <b>0.123</b> | <b>0.234</b> | <b>2392.211</b> | <b>159</b> |
| GXN              | 0.0278       | 0.125        | 3185.392        | 271        |
| GXN+Ours (1)     | 0.118        | 0.225        | 2500.032        | 165        |
| GXN+Ours (2)     | 0.123        | 0.234        | 24788.653       | 160        |
| GXN+Ours (3)     | <b>0.128</b> | <b>0.239</b> | <b>2400.549</b> | <b>154</b> |
| PVSE             | 0.0280       | 0.129        | 2943.513        | 258        |
| PVSE+Ours (1)    | 0.104        | 0.234        | 2485.331        | 163        |
| PVSE+Ours (2)    | 0.114        | 0.243        | 2403.231        | 160        |
| PVSE+Ours (3)    | <b>0.125</b> | <b>0.249</b> | <b>2385.654</b> | <b>154</b> |
| SAN              | 0.0286       | 0.130        | 2861.242        | 248        |
| SAN+Ours (1)     | 0.122        | 0.242        | 2433.492        | 153        |
| SAN+Ours (2)     | 0.126        | 0.249        | 2400.210        | 150        |
| SAN+Ours (3)     | <b>0.134</b> | <b>0.252</b> | <b>2349.329</b> | <b>143</b> |
| VSRRN            | 0.0390       | 0.130        | 2861.242        | 248        |
| VSRRN+Ours (1)   | 0.124        | 0.248        | 2394.391        | 147        |
| VSRRN+Ours (2)   | 0.139        | 0.258        | 2268.549        | 140        |
| VSRRN+Ours (3)   | <b>0.156</b> | <b>0.262</b> | <b>2194.549</b> | <b>138</b> |
| PCME             | 0.0341       | 0.131        | 2822.341        | 253        |
| PCME+Ours (1)    | 0.102        | 0.229        | 2499.323        | 164        |
| PCME+Ours (2)    | 0.114        | 0.234        | 2349.432        | 154        |
| PCME+Ours (3)    | <b>0.122</b> | <b>0.243</b> | <b>2302.320</b> | <b>149</b> |
| SDE              | 0.0304       | 0.142        | 2755.495        | 249        |
| SDE+Ours (1)     | 0.115        | 0.236        | 2423.391        | 154        |
| SDE+Ours (2)     | 0.120        | 0.242        | 2402.223        | 150        |
| SDE+Ours (3)     | <b>0.123</b> | <b>0.245</b> | <b>2304.534</b> | <b>143</b> |
| CLIP             | 0.0405       | 0.151        | 2742.491        | 231        |
| CLIP+Ours (1)    | 0.112        | 0.247        | 2313.441        | 146        |
| CLIP+Ours (2)    | 0.121        | 0.253        | 2232.322        | 140        |
| CLIP+Ours (3)    | <b>0.132</b> | <b>0.260</b> | <b>2021.201</b> | <b>132</b> |
| BLIP             | 0.0454       | 0.173        | 2652.311        | 227        |
| BLIP+Ours (1)    | 0.121        | 0.264        | 2223.486        | 128        |
| BLIP+Ours (2)    | 0.127        | 0.272        | 2185.433        | 120        |
| BLIP+Ours (3)    | <b>0.134</b> | <b>0.275</b> | <b>2100.212</b> | <b>114</b> |

**Table 7: Experimental results for evaluating the effects of multiple-round re-ranking using the biased-MSOCO DB.**

|                  | R@1          | R@10         | Mean          | Med      |
|------------------|--------------|--------------|---------------|----------|
| UVS              | 0.161        | 0.471        | 57.684        | 12       |
| UVS+Ours (1)     | 0.321        | 0.705        | 22.441        | 7        |
| UVS+Ours (2)     | 0.334        | 0.734        | 21.322        | 6        |
| UVS+Ours (3)     | <b>0.345</b> | <b>0.756</b> | <b>20.002</b> | <b>4</b> |
| OE               | 0.194        | 0.532        | 39.144        | 10       |
| OE+Ours (1)      | 0.339        | 0.739        | 19.422        | 5        |
| OE+Ours (2)      | 0.343        | 0.754        | 18.534        | 5        |
| OE+Ours (3)      | <b>0.345</b> | <b>0.765</b> | <b>17.653</b> | <b>5</b> |
| DPC              | 0.295        | 0.665        | 25.142        | 9        |
| DPC+Ours (1)     | 0.359        | 0.752        | 17.702        | 4        |
| DPC+Ours (2)     | 0.365        | 0.767        | 15.423        | 3        |
| DPC+Ours (3)     | <b>0.377</b> | <b>0.774</b> | <b>12.332</b> | <b>3</b> |
| VSEPP            | 0.305        | 0.650        | 24.771        | 8        |
| VSEPP+Ours (1)   | 0.426        | 0.784        | 16.666        | 4        |
| VSEPP+Ours (2)   | 0.434        | 0.798        | 15.432        | 3        |
| VSEPP+Ours (3)   | <b>0.443</b> | <b>0.802</b> | <b>14.633</b> | <b>3</b> |
| RRF-Net          | 0.314        | 0.635        | 19.324        | 8        |
| RRF-Net+Ours (1) | 0.429        | 0.744        | 15.638        | 4        |
| RRF-Net+Ours (2) | 0.434        | 0.754        | 14.533        | 3        |
| RRF-Net+Ours (3) | <b>0.444</b> | <b>0.765</b> | <b>13.330</b> | <b>3</b> |
| CMPM             | 0.326        | 0.687        | 18.567        | 6        |
| CMPM+Ours (1)    | 0.482        | 0.784        | 12.485        | 3        |
| CMPM+Ours (2)    | 0.485        | 0.792        | 11.533        | 3        |
| CMPM+Ours (3)    | <b>0.492</b> | <b>0.802</b> | <b>11.001</b> | <b>3</b> |
| SISM             | 0.335        | 0.716        | 15.126        | 4        |
| SISM+Ours (1)    | 0.448        | 0.814        | 11.329        | 2        |
| SISM+Ours (2)    | 0.453        | 0.822        | 10.634        | 2        |
| SISM+Ours (3)    | <b>0.466</b> | <b>0.827</b> | <b>9.978</b>  | <b>2</b> |
| GXN              | 0.332        | 0.741        | 15.441        | 4        |
| GXN+Ours (1)     | 0.449        | 0.799        | 9.592         | 2        |
| GXN+Ours (2)     | 0.452        | 0.807        | 8.645         | 2        |
| GXN+Ours (3)     | <b>0.463</b> | <b>0.822</b> | <b>8.001</b>  | <b>2</b> |
| PVSE             | 0.343        | 0.761        | 15.810        | 2        |
| PVSE+Ours (1)    | 0.462        | 0.864        | 9.320         | 1        |
| PVSE+Ours (2)    | 0.477        | 0.872        | 8.654         | 1        |
| PVSE+Ours (3)    | <b>0.485</b> | <b>0.884</b> | <b>8.043</b>  | <b>1</b> |
| SAN              | 0.347        | 0.768        | 15.110        | 2        |
| SAN+Ours (1)     | 0.471        | 0.842        | 9.603         | 1        |
| SAN+Ours (2)     | 0.479        | 0.855        | 9.032         | 1        |
| SAN+Ours (3)     | <b>0.521</b> | <b>0.859</b> | <b>8.543</b>  | <b>1</b> |
| VSRRN            | 0.379        | 0.793        | 14.332        | 2        |
| VSRRN+Ours (1)   | 0.504        | 0.885        | 7.417         | 1        |
| VSRRN+Ours (2)   | 0.512        | 0.889        | 7.065         | 1        |
| VSRRN+Ours (3)   | <b>0.527</b> | <b>0.893</b> | <b>6.767</b>  | <b>1</b> |
| PCME             | 0.348        | 0.749        | 18.551        | 3        |
| PCME+Ours (1)    | 0.464        | 0.853        | 11.002        | 1        |
| PCME+Ours (2)    | 0.486        | 0.861        | 10.390        | 1        |
| PCME+Ours (3)    | <b>0.499</b> | <b>0.873</b> | <b>9.765</b>  | <b>1</b> |
| SDE              | 0.349        | 0.751        | 17.422        | 3        |
| SDE+Ours (1)     | 0.469        | 0.861        | 10.338        | 1        |
| SDE+Ours (2)     | 0.478        | 0.875        | 9.877         | 1        |
| SDE+Ours (3)     | <b>0.499</b> | <b>0.879</b> | <b>8.995</b>  | <b>1</b> |
| CLIP             | 0.354        | 0.752        | 17.531        | 3        |
| CLIP+Ours (1)    | 0.474        | 0.834        | 10.021        | 1        |
| CLIP+Ours (2)    | 0.487        | 0.844        | 9.888         | 1        |
| CLIP+Ours (3)    | <b>0.492</b> | <b>0.851</b> | <b>9.432</b>  | <b>1</b> |
| BLIP             | 0.385        | 0.763        | 14.212        | 2        |
| BLIP+Ours (1)    | 0.489        | 0.874        | 8.411         | 1        |
| BLIP+Ours (2)    | 0.494        | 0.898        | 8.096         | 1        |
| BLIP+Ours (3)    | <b>0.504</b> | <b>0.902</b> | <b>7.653</b>  | <b>1</b> |

## 5 EVALUATING THE EFFECT OF HYPERPARAMETERS

For further understanding of our approach, we extensively conducted various extensive ablation studies. Specifically, we examined the effects of the hyperparameters  $\alpha$ ,  $\beta$ ,  $\gamma$ , and  $\delta$ . Each experiment follows the same settings in the main paper, and we report the experimental results of changing each hyperparameter. For the experiments with  $\alpha$ ,  $\beta$ ,  $\gamma$ , and  $\delta$ , we show the experimental results with the MSCOCO dataset using R@1 and R@10.

**Effect of  $\alpha$ .** The hyperparameter  $\alpha$  balances the importance of each rank in the initial retrieval results. The lower (resp. higher)  $\alpha$  leads to focus on the higher (resp. entire) ranks of the initial retrieval results. Experimental results regarding  $\alpha$  are shown in Figs. 1 and 2. In each result, lower  $\alpha$  indicates better performance. It implies that focusing on the higher ranks of the initial retrieval results is important for generating effective questions.

**Effect of  $\beta$ .** The hyperparameter  $\beta$  balances the effect of the initial retrieval and our re-ranking. The lower (resp. higher)  $\beta$  leads to mainly focus on initial retrieval (resp. our re-ranking). Experimental results regarding  $\beta$  are shown in Figs. 3 and 4. In each result, the higher  $\beta$  indicates better performance. It means that our re-ranking contributes to the improvement of the cross-modal image retrieval performance.

**Effect of  $\gamma$ .** The hyperparameter  $\gamma$  balances the importance of the re-ranking loss  $L^{\text{rank}}$  and the discriminative loss  $L^{\text{D}}$ . The lower (resp. higher)  $\gamma$  leads to focus on the re-ranking loss (resp. the discriminative loss). Experimental results regarding  $\gamma$  are shown in Figs. 5 and 6. In each result, the higher  $\gamma$  indicates better performance. Similar to the experimental results in the main paper, these results mean that introducing  $L^{\text{D}}$  is also effective for enhancing retrieval performance. Further analysis of these results can lead to further improvement of the retrieval performance, and then we will tackle them in our future works.

**Effect of  $\delta$ .** The hyperparameter  $\delta$  is a margin hyperparameter of the re-ranking loss. Its parameter determines the acceptable distance between the paired and the non-paired samples. Experimental results regarding  $\delta$  are shown in Figs. 7 and 8. In each result, the performance suddenly decreases in  $\gamma \geq 0.7$ . We consider that these results come from the hyperparameter  $\beta$ . In this experiment, we set  $\beta = 0.6$ , and then our approach cannot make the distance between the paired and the non-paired samples by the value of 0.7. The relationships between  $\beta$  and  $\gamma$  will be further analyzed in our future works.



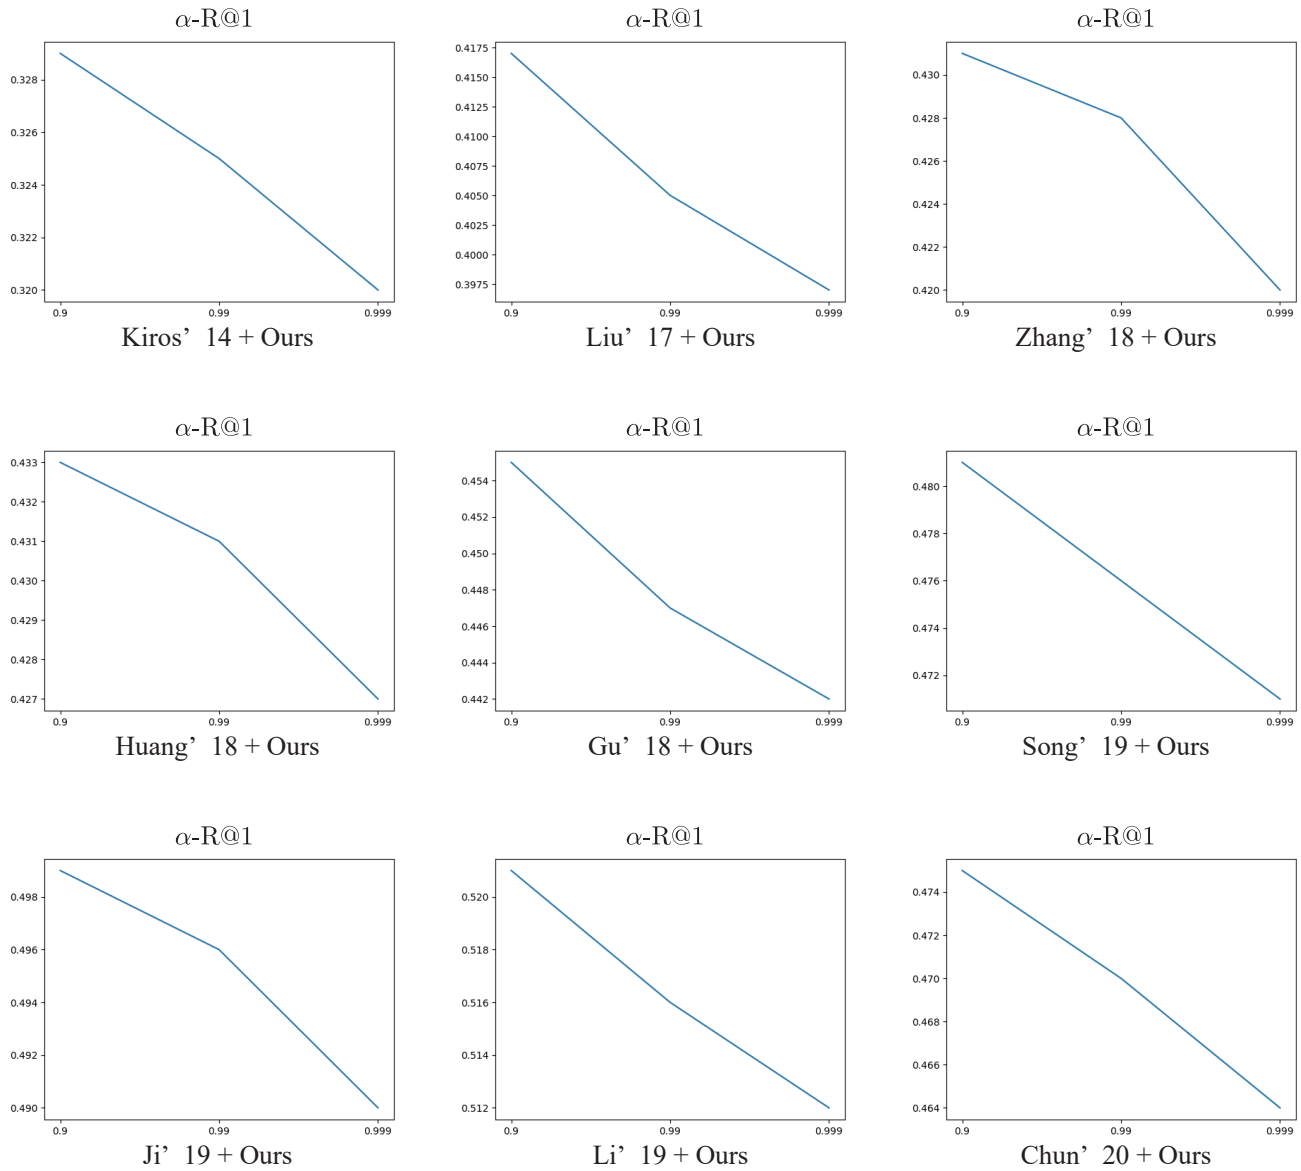

**Figure 1: Experimental results for evaluating the effect of  $\alpha$  on MSCOCO dataset using R@1. The higher value indicates better retrieval performance.**

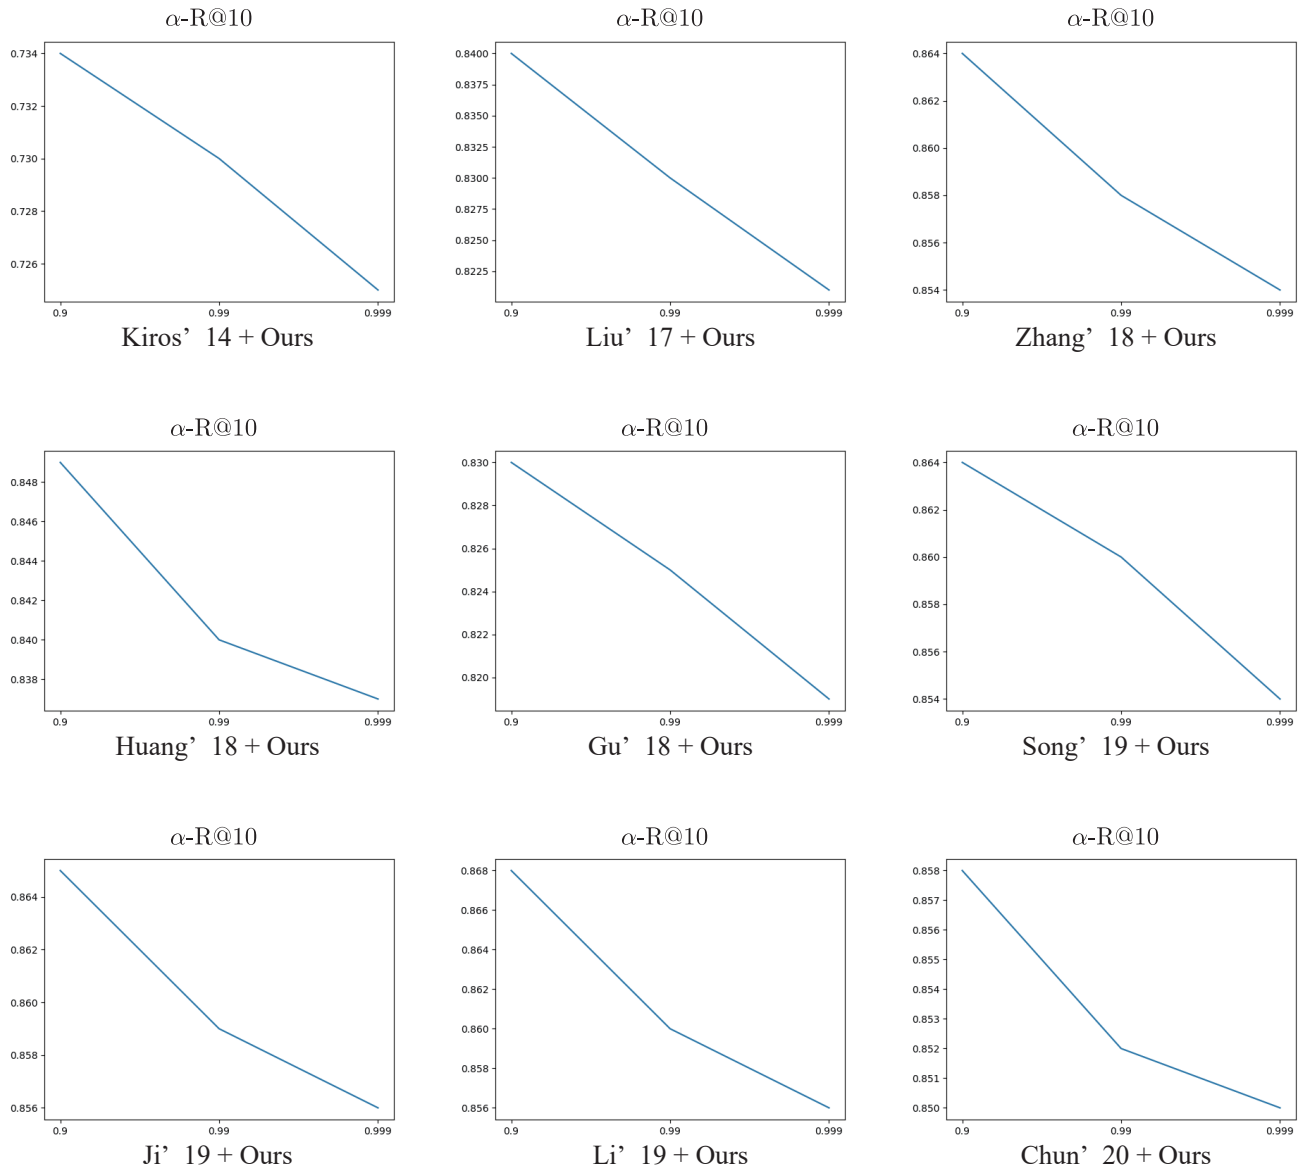

**Figure 2: Experimental results for evaluating the effect of  $\alpha$  on MSCOCO dataset using R@10. The higher value indicates better retrieval performance.**



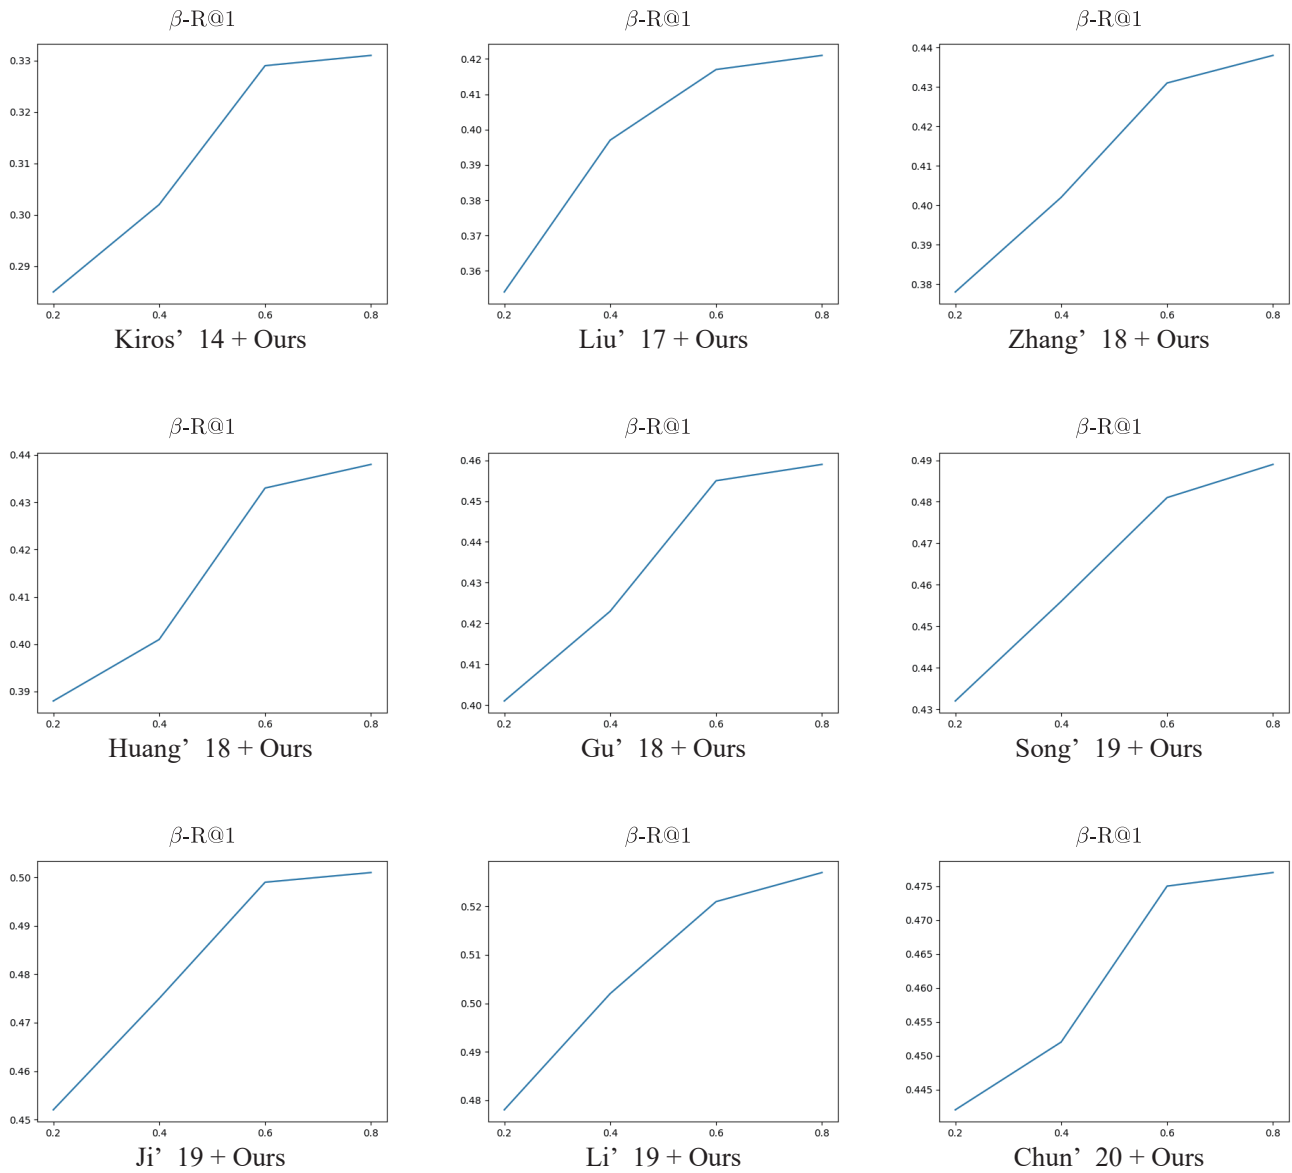

Figure 3: Experimental results for evaluating the effect of  $\beta$  on MSCOCO dataset using R@1. The higher value indicates better retrieval performance.

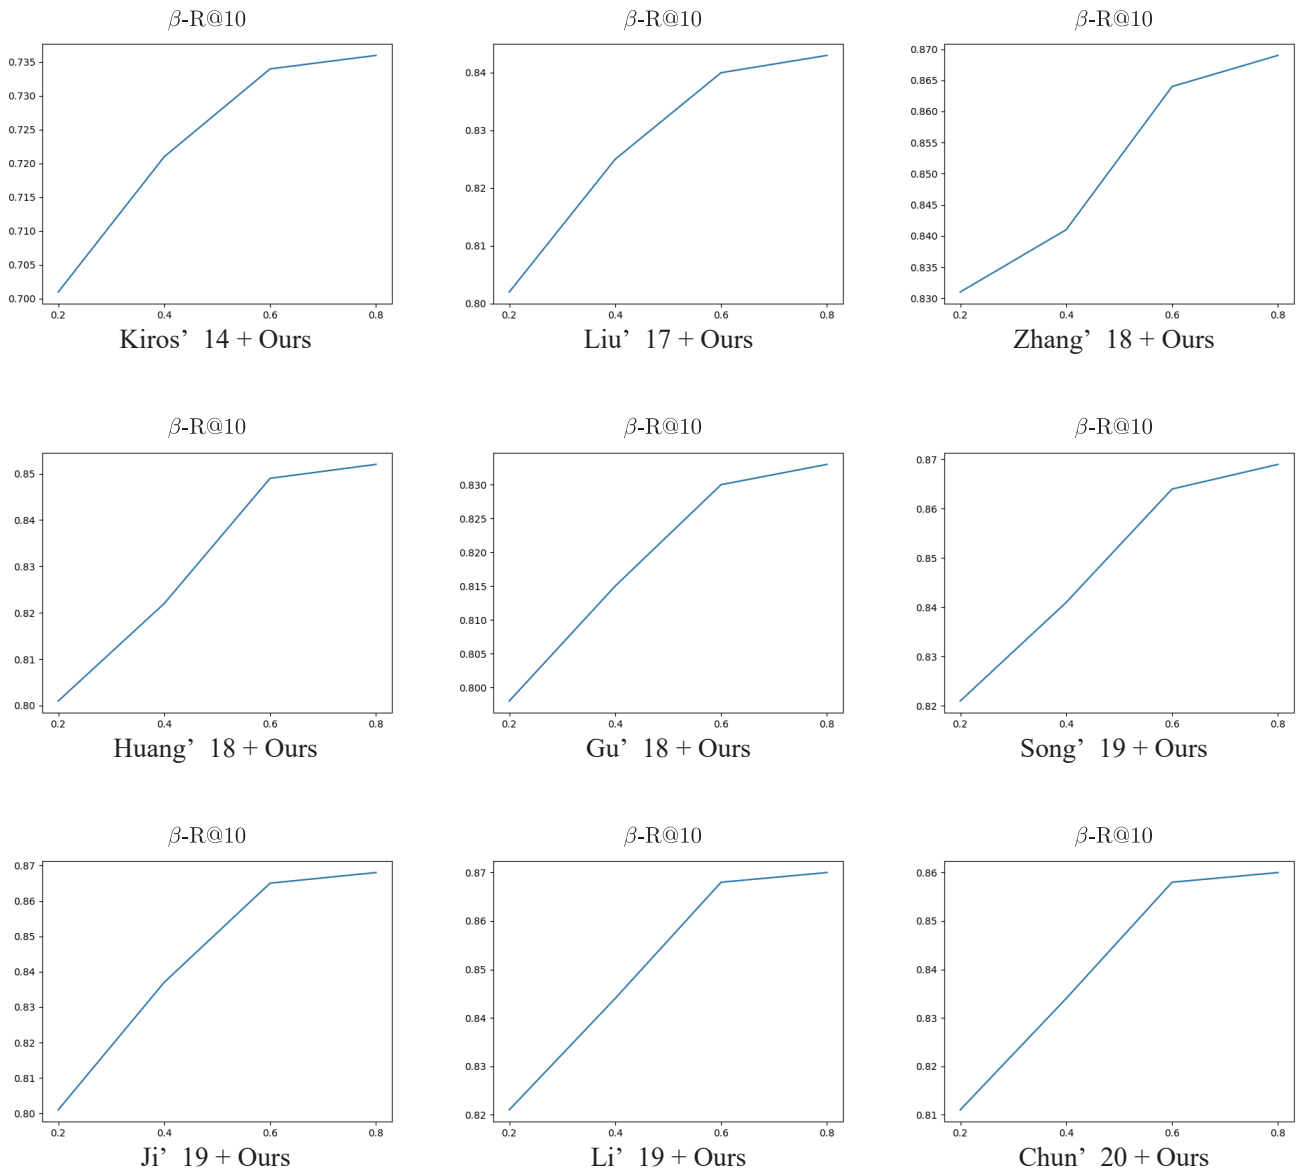

Figure 4: Experimental results for evaluating the effect of  $\beta$  on MSCOCO dataset using R@10. The higher value indicates better retrieval performance.

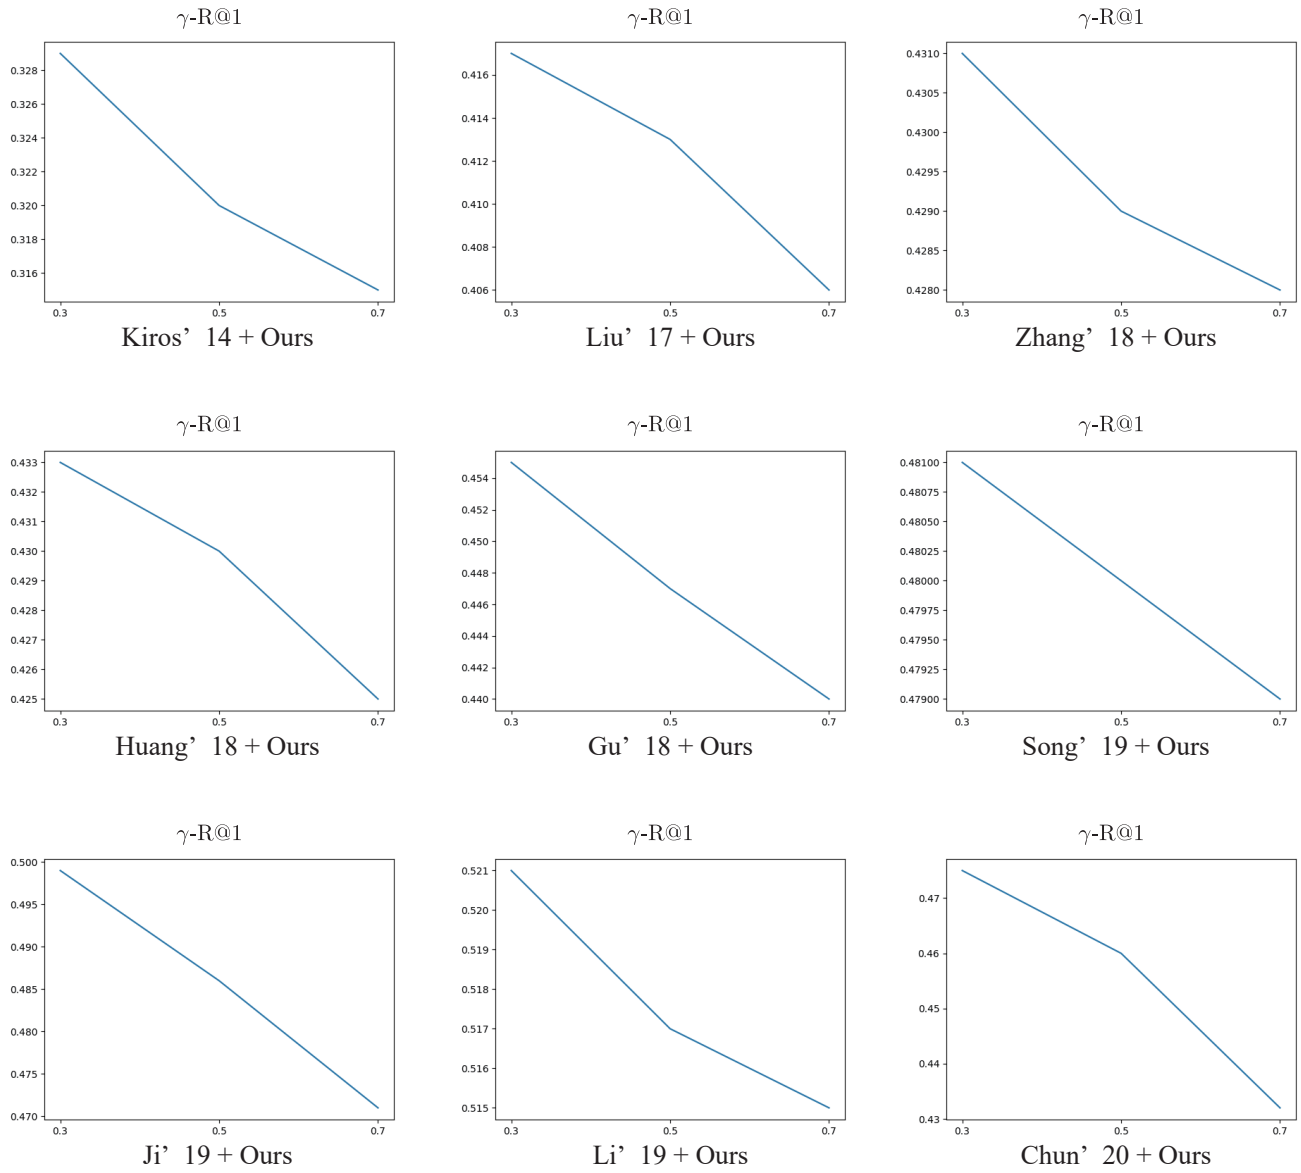

**Figure 5: Experimental results for evaluating the effect of  $\gamma$  on MSCOCO dataset using R@1. The higher value indicates better retrieval performance.**

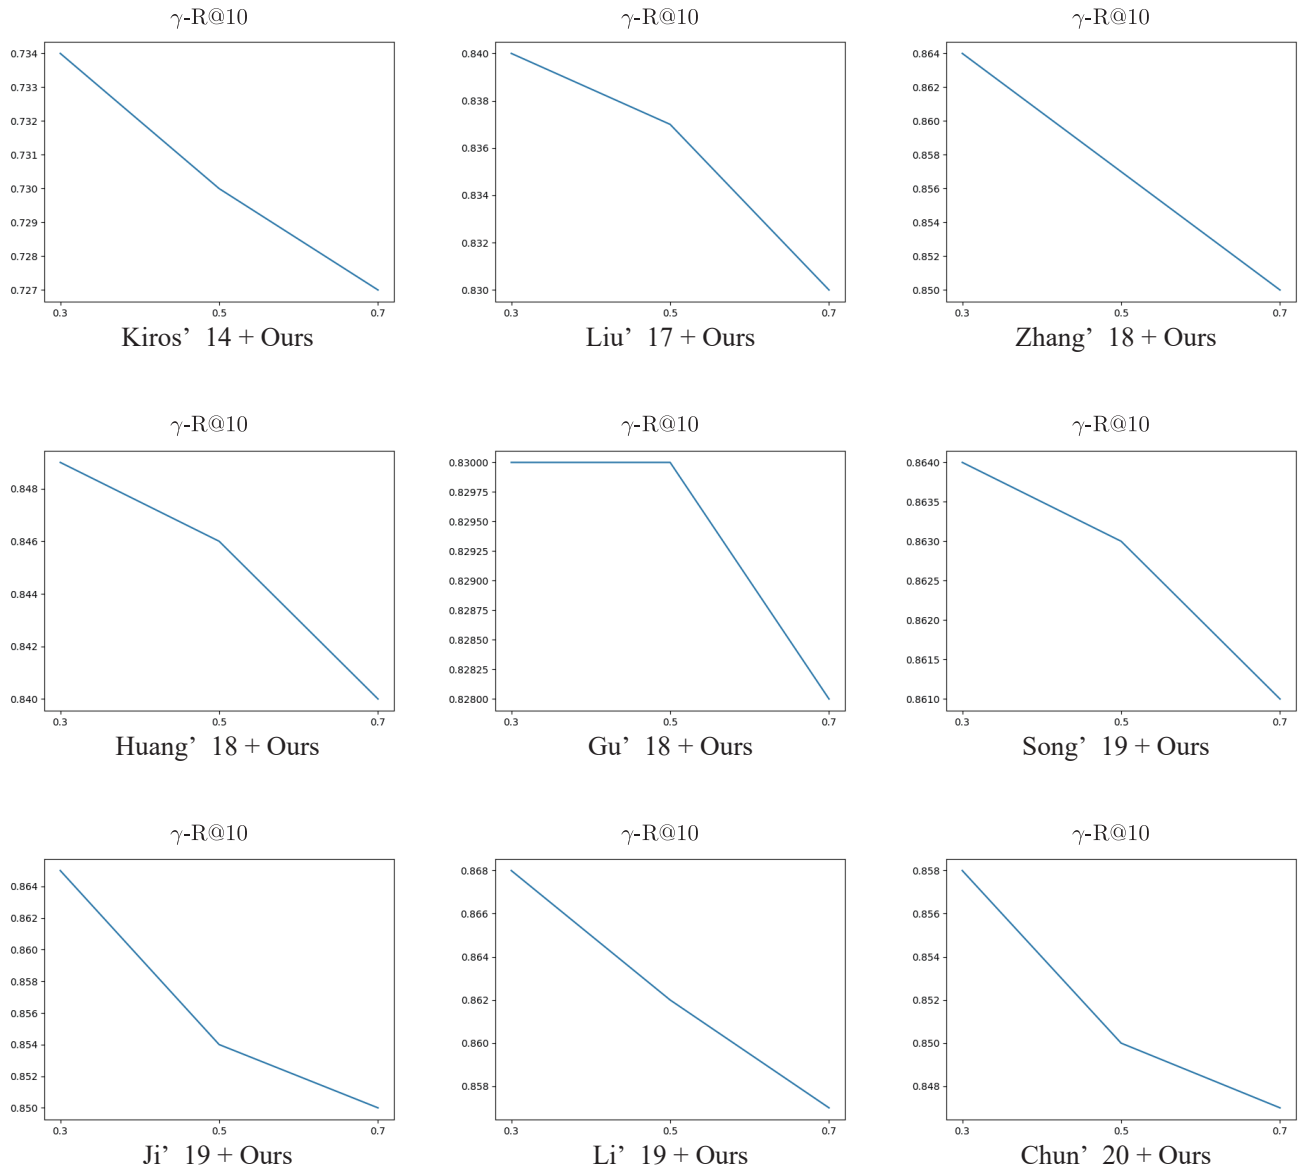

**Figure 6: Experimental results for evaluating the effect of  $\gamma$  on MSCOCO dataset using R@10. The higher value indicates better retrieval performance.**

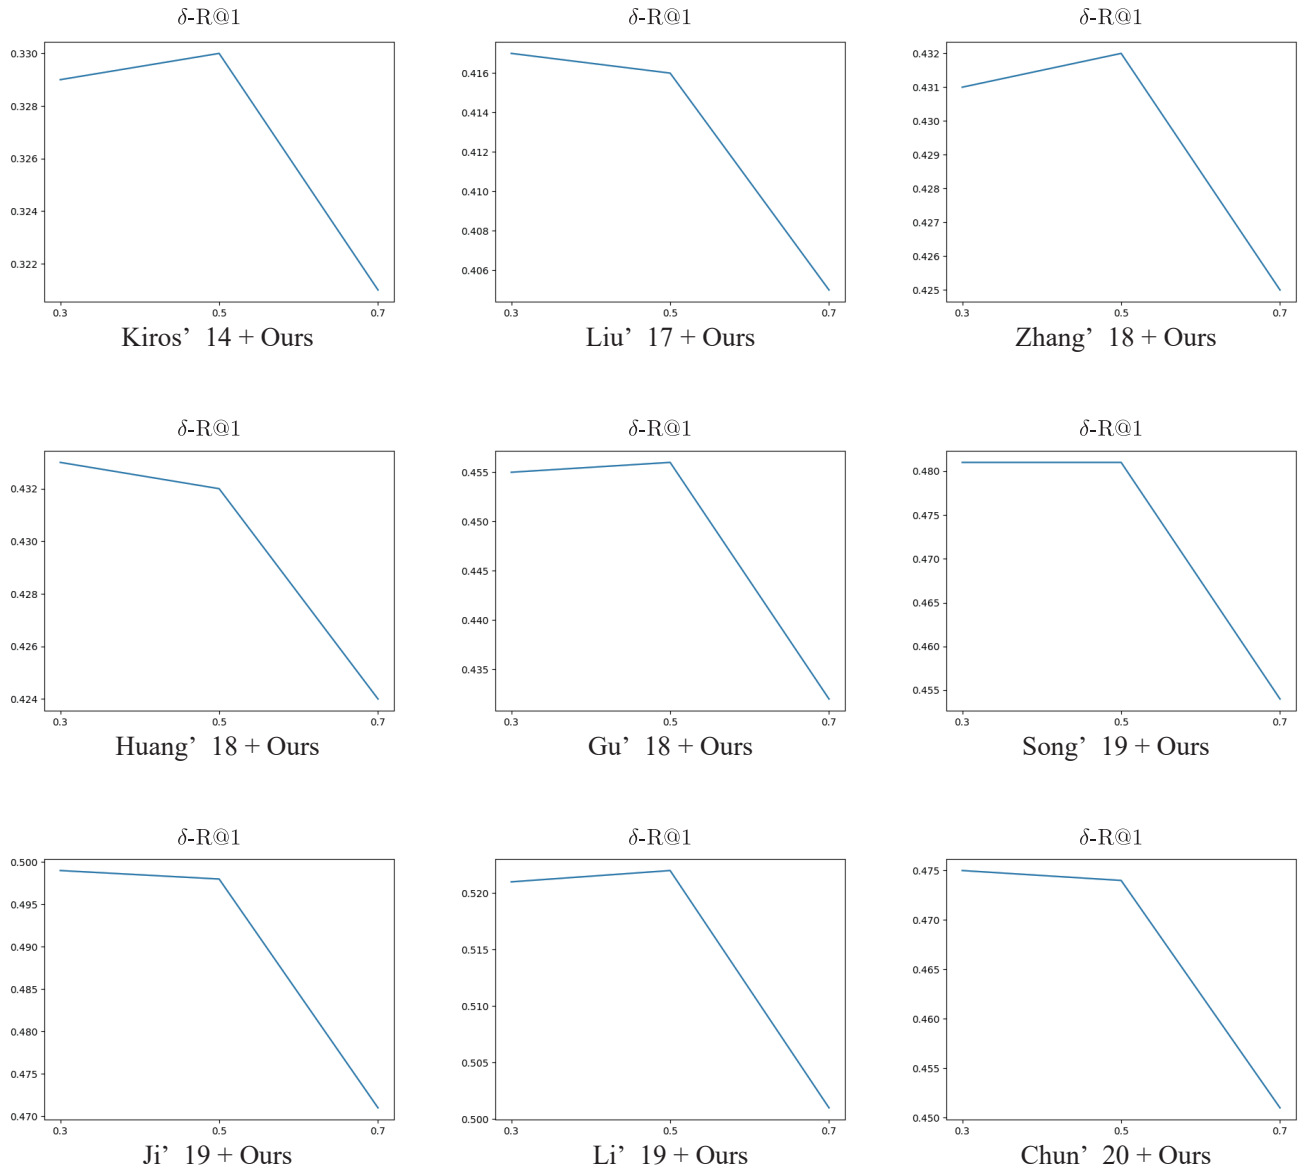

**Figure 7: Experimental results for evaluating the effect of  $\delta$  on MSCOCO dataset using R@1. The higher value indicates better retrieval performance.**

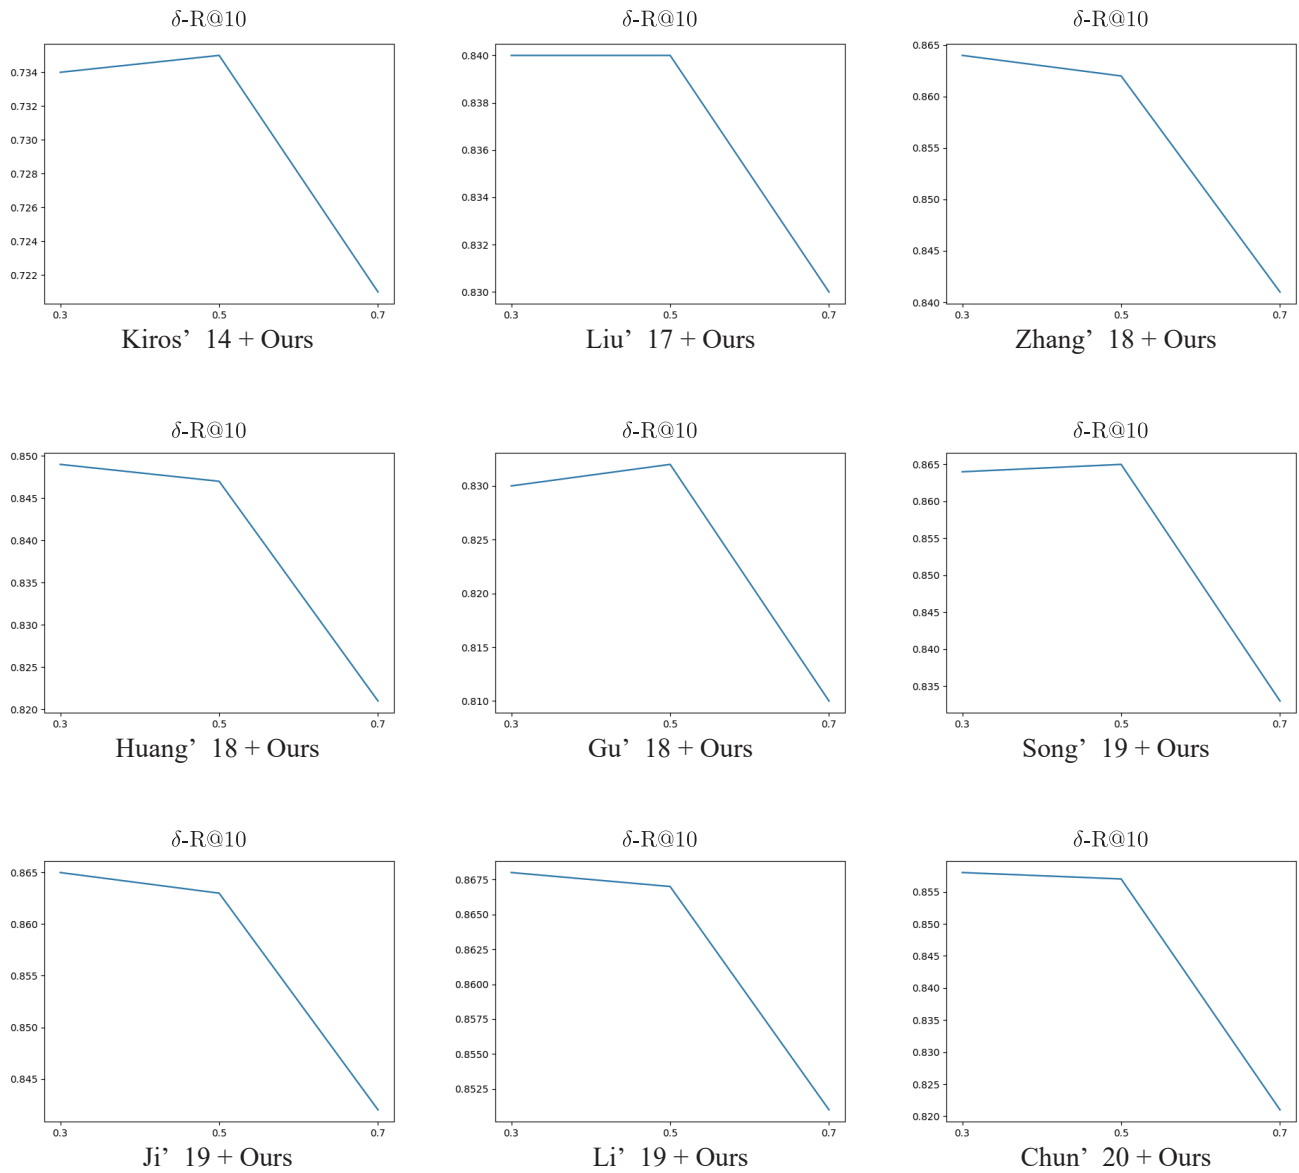

**Figure 8: Experimental results for evaluating the effect of  $\delta$  on MSCOCO dataset using R@10. The higher value indicates better retrieval performance.**

REFERENCES

[1] Fartash Faghri, David J Fleet, Jamie Ryan Kiros, Google Brain Toronto, and Sanja Fidler. 2017. VSE ++ : Improving visual-semantic embeddings with hard negatives. *arXiv:1707.05612* (2017).

[2] Jiuxiang Gu, Jianfei Cai, Shafiq R Joty, Li Niu, and Gang Wang. 2018. Look, imagine and match: Improving textual-visual cross-modal retrieval with generative models. In *Proceedings of the IEEE Conference on Computer Vision and Pattern Recognition*. 7181–7189.

[3] Yan Huang, Qi Wu, Chunfeng Song, and Liang Wang. 2018. Learning semantic concepts and order for image and sentence matching. In *Proceedings of the IEEE Conference on Computer Vision and Pattern Recognition*. 6163–6171.

[4] Zhong Ji, Haoran Wang, Jungong Han, and Yanwei Pang. 2019. Saliency-guided attention network for image-sentence matching. In *Proceedings of the IEEE International Conference on Computer Vision*. 5754–5763.

[5] Ryan Kiros, Ruslan Salakhutdinov, and Richard S. Zemel. 2014. Unifying visual-semantic embeddings with multimodal neural language models. *arXiv:1411.2539* (2014).

[6] Kunpeng Li, Yulun Zhang, Kai Li, Yuanyuan Li, and Yun Fu. 2019. Visual semantic reasoning for image-text matching. In *Proceedings of the IEEE International Conference on Computer Vision*. 4654–4662.

[7] Yu Liu, Yanming Guo, Erwin M. Bakker, and Michael S. Lew. 2017. Learning a recurrent residual fusion network for multimodal matching. In *Proceedings of the IEEE International Conference on Computer Vision*. 4107–4116.

[8] Yale Song and Mohammad Soleymani. 2019. Polysemous visual-semantic embedding for cross-modal retrieval. In *Proceedings of the IEEE Conference on Computer Vision and Pattern Recognition*. 1979–1978.

[9] Ivan Vendrov, Ryan Kiros, Sanja Fidler, and Raquel Urtasun. 2016. Order-embeddings of images and language. In *Proceedings of the International Conference on Learning Representations*. 1–12.

[10] Ying Zhang and Huchuan Lu. 2018. Deep cross-modal projection learning for image-text matching. In *Proceedings of the IEEE European Conference on Computer Vision*. 686–701.

[11] Zhedong Zheng, Liang Zheng, Michael Garrett, Yi Yang, and Yi-Dong Shen. 2020. Dual-path convolutional image-text embedding with instance loss. *ACM Transactions on Multimedia Computing, Communications, and Applications* (2020).
